# Supplementary material for: One-pot solution synthesis of shape-controlled copper selenide nanostructures and their potential applications in photocatalysis and photothermal therapy
Source: Royal Society of Chemistry journal article supplement (doi:10.1039/c7nr04851c), 2017-01-01
Supplement: c7nr04851c1.pdf [file c7nr04851c1.pdf]

## Electronic Supplementary Information

### One-pot solution synthesis of shape-controlled copper selenide nanostructures and their potential applications in photocatalysis and photothermal therapy

Xianwen Wang<sup>a‡</sup>, Zhaohua Miao<sup>a‡</sup>, Yan Ma<sup>a\*</sup>, Huajian Chen<sup>a</sup>, Haisheng Qian<sup>a\*</sup>, and Zhengbao Zha<sup>a\*</sup>

<sup>a</sup>School of Biological and Medical Engineering, Hefei University of Technology, Hefei, Anhui 230009, P. R. China.

\* Corresponding author. Email: [yanma@hfut.edu.cn](mailto:yanma@hfut.edu.cn); [shqian@hfut.edu.cn](mailto:shqian@hfut.edu.cn); [zbzha@hfut.edu.cn](mailto:zbzha@hfut.edu.cn); Tel: +86 551 62901285.

‡ These authors contributed equally to this work.

### Experimental Details:

#### Calculation method for the photothermal conversion efficiency<sup>1</sup>

According to Roper's report, the total energy balance between input and dissipation for the system can be given as:

$$\sum_i m_i C_i \frac{dT}{dt} = Q_{NC} + Q_{sys} - Q_{out} \quad (1)$$

Where  $m$  and  $C$  are the mass and heat capacity of water, respectively,  $T$  is the solution temperature,  $Q_{NC}$  is the energy absorbed by NCs,  $Q_{sys}$  is the energy imputed by the pure water system, and  $Q_{out}$  is heat dissipation of the system.

The heat absorbed ( $Q_{NC}$ ) by PEGylated Cu<sub>2</sub>Te NCs can be shown as:

$$Q_{NC} = I(1 - 10^{-A_{808}})\eta \quad (2)$$

Where  $I$  is incident laser power in W,  $\eta$  is the photothermal conversion efficiency, and  $A_{808}$  indicates the absorbance of the PEGylated Cu<sub>2</sub>Te NCs at 808 nm.

$Q_{out}$  is linear with system temperature, as expressed as:

$$Q_{out} = hS(T - T_{surr}) \quad (3)$$

Where  $h$  is heat transfer coefficient,  $S$  is the surface area of the container, and  $T_{surr}$

is ambient temperature of the surroundings.

When the system reaches a steady state temperature ( $T_{max}$ ), the heat input and output are balanced:

$$Q_{NC} + Q_{sys} = Q_{out} = hS(T_{max} - T_{surr}) \quad (4)$$

After the laser is removed, the  $Q_{NC} + Q_{sys} = 0$ , reducing the Eq. (1)

$$\sum_i m_i C_i \frac{dT}{dt} = -Q_{out} = -hS(T - T_{surr}) \quad (5)$$

Rearranging the Eq. (5) would give

$$dt = - \frac{\sum_i m_i C_i}{hS} \frac{dT}{(T - T_{surr})} \quad (6)$$

And integrating, give the expression

$$t = - \frac{\sum_i m_i C_i}{hS} \ln \frac{T - T_{surr}}{(T_{max} - T_{surr})} \quad (7)$$

A system time constant  $\tau_s$  is defined as:

$$\tau_s = - \frac{\sum_i m_i C_i}{hS} \quad (8)$$

And  $\theta$  is introduced using the maximum system temperature,  $T_{max}$

$$\theta = \frac{T - T_{surr}}{(T_{max} - T_{surr})} \quad (9)$$

Substituting Eq. (8) and (9) giving:

$$t = -\tau_s \ln \theta \quad (10)$$

Therefore, the time constant for heat transfer from the system  $\tau_s$  can be determined by applying the linear time data from the cooling period vs. negative natural logarithm of driving force temperature ( $\theta$ )

Since  $Q_{sys}$  can be obtained directly as

$$Q_{sys} = hS(T_{max,H_2O} - T_{surr}) \quad (11)$$

Eq. (4) can be given as:

$$Q_{NC} = I(1 - 10^{-A_{808}})\eta = hS(T_{max} - T_{max,H_2O}) \quad (12)$$

Also

$$hS = -\frac{\sum_i m_i C_i}{\tau_s} \quad (13)$$

## References

1. D. K. Roper, W. Ahn and M. Hoepfner, *J Phys Chem C Nanomater Interfaces*, 2007, **111**, 3636-3641.

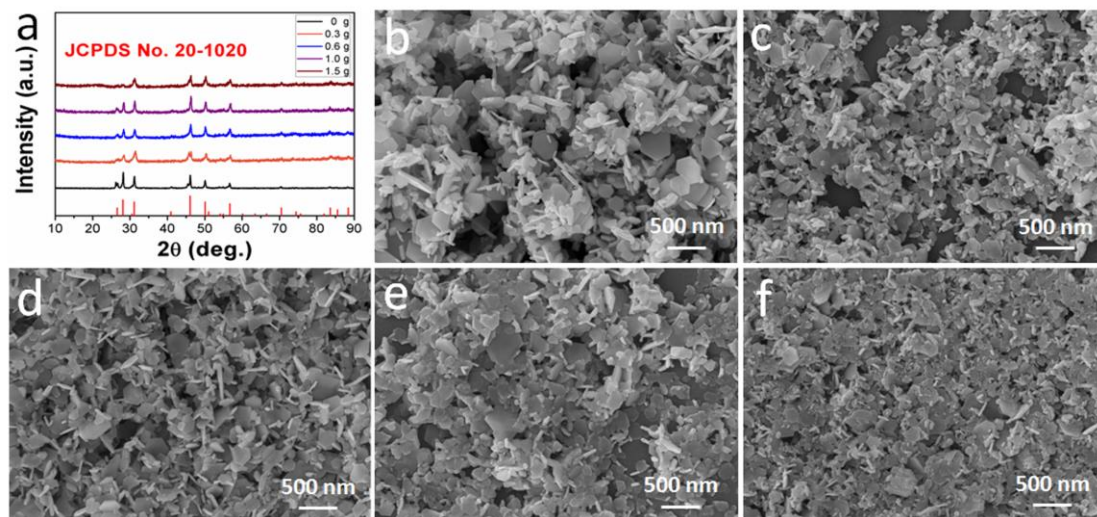

**Fig. S1** Characterization of CuSe nanoplates obtained from reactions with different amount of PVP. a) XRD characterization of obtained CuSe nanoplates; SEM images of CuSe nanoplates by using different amount of PVP: b) 0 g; c) 0.3 g; d) 0.6 g; e) 1.0 g and f) 1.5 g.

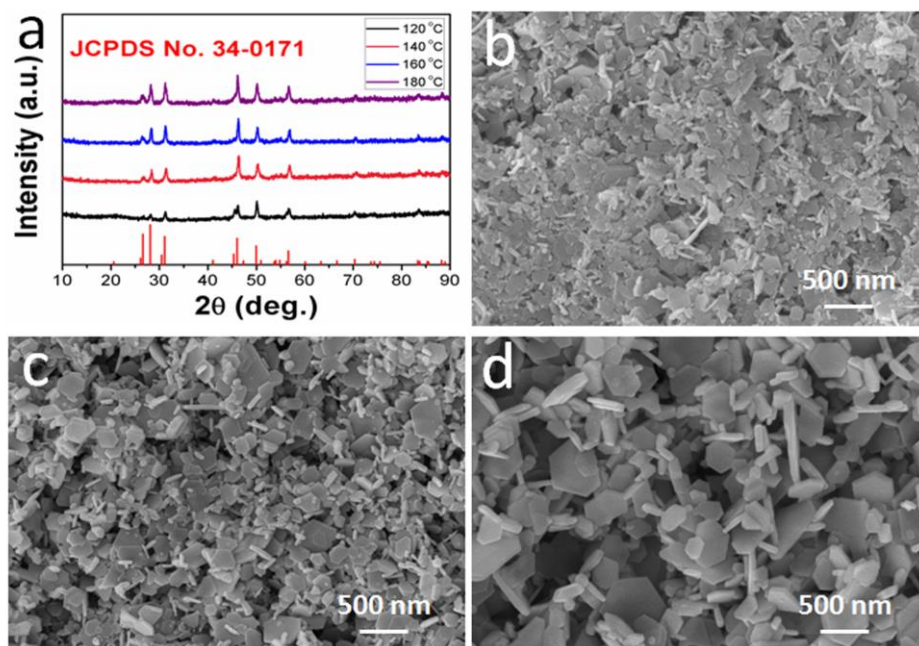

**Fig. S2** Characterization of CuSe nanoplates obtained from reactions with different reaction temperatures. a) XRD characterization of obtained CuSe nanoplates; SEM images of CuSe nanoplates with different reaction temperatures: b) 120 °C; c) 140 °C and d) 180 °C.

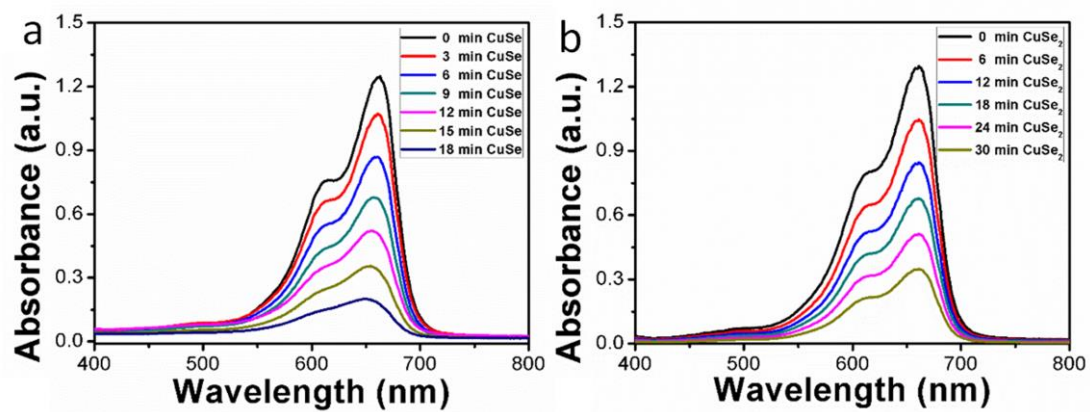

**Fig. S3** UV-vis absorption spectra of MB aqueous solution in the presence of a) CuSe nanoplates and b) CuSe<sub>2</sub> nanosheets with H<sub>2</sub>O<sub>2</sub> (1.0 mL) during photodegradation.

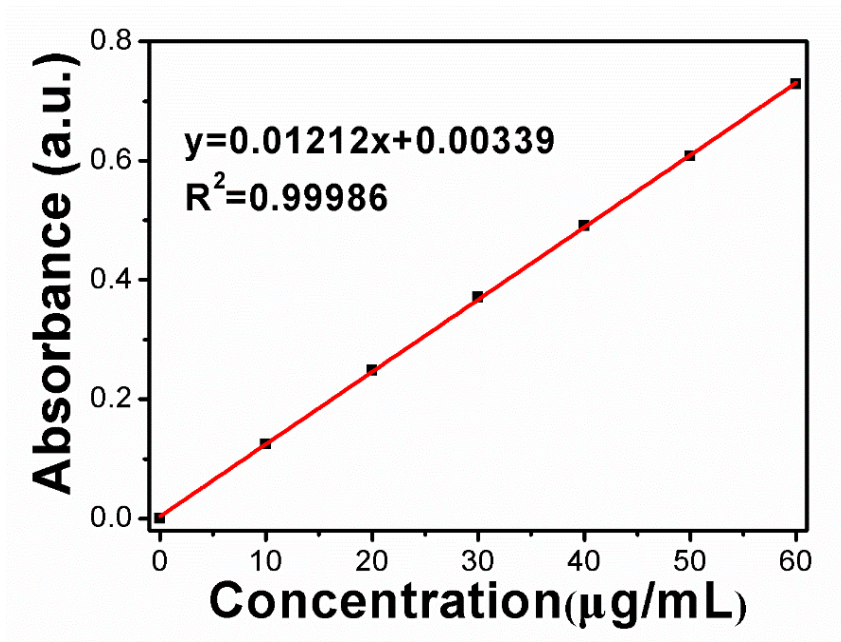

**Fig. S4** The absorbance of CuSe nanoplates at 808 nm increased as the concentration of CuSe nanoplates increased.

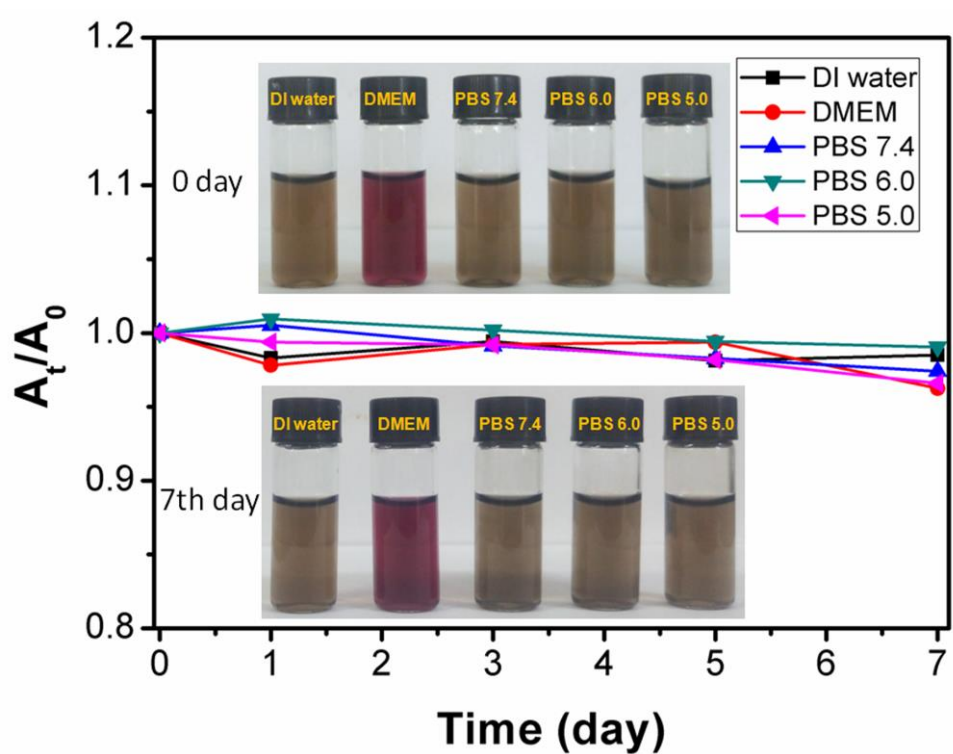

**Fig. S5** The stability of CuSe nanoplates characterized in different medium, including DI water, DMEM cell culture medium, PBS with different pH (7.4, 6.0 and 5.0); insets: photographs of CuSe nanoplates dispersions.
